# Supplementary material for: ATAC-seq Guided Interpretable Machine Learning Reveals Cancer-Specific Chromatin Features in Cell-free DNA
Source: Research Square preprint supplement (doi:10.21203/rs.3.rs-5485170/v1), 2025-01-13
Supplement: Supplementary file 1 [file 389ac81ab2399548733bf927.xlsx]

## Sheet: 2804 Significant Peaks
Supplementary table 1. 2,804 compiled bresat cancer cfDNA differential peaks
chr1	100715100	100715800
chr1	100859572	100859592
chr1	1008850	1010000
chr1	103016350	103016700
chr1	1057351	1057875
chr1	1079326	1080075
chr1	108622126	108622800
chr1	109102300	109102850
chr1	1092826	1093800
chr1	109805890	109806230
chr1	110021500	110021850
chr1	110182800	110183250
chr1	110855176	110855550
chr1	111161926	111162750
chr1	113615150	113616100
chr1	1142061	1142081
chr1	116255800	116256250
chr1	1173976	1174275
chr1	11795800	11796400
chr1	118197001	118197600
chr1	118198576	118199400
chr1	120092200	120092650
chr1	120156300	120156850
chr1	120611851	120612375
chr1	121260526	121261800
chr1	1234876	1235250
chr1	1281301	1281675
chr1	1284750	1284770
chr1	1285050	1285450
chr1	1310350	1311150
chr1	144010051	144010350
chr1	145209109	145209129
chr1	145438459	145438479
chr1	145457150	145457650
chr1	145574900	145575600
chr1	146649682	146649702
chr1	147112450	147112950
chr1	147735250	147736350
chr1	149575750	149576450
chr1	150227700	150228250
chr1	150533251	150537075
chr1	150946126	150946650
chr1	151129501	151130100
chr1	151966000	151966850
chr1	152007400	152008000
chr1	153327850	153328500
chr1	153599300	153600350
chr1	154154476	154155150
chr1	154166150	154166850
chr1	154540100	154540750
chr1	155140150	155140800
chr1	155145863	155145883
chr1	155148950	155149600
chr1	155200756	155200776
chr1	156030550	156031250
chr1	156065950	156066350
chr1	156084150	156084850
chr1	156115600	156116200
chr1	156186000	156186800
chr1	156474600	156474900
chr1	156810676	156811050
chr1	156828800	156828820
chr1	156861950	156862550
chr1	158094600	158095250
chr1	158147450	158148000
chr1	15905401	15906150
chr1	159168010	159168550
chr1	159770291	159770311
chr1	159990080	159990100
chr1	160055350	160055800
chr1	160070650	160071300
chr1	160596751	160597125
chr1	16067750	16068350
chr1	160924579	160924599
chr1	161041550	161042100
chr1	161154901	161156025
chr1	161162251	161162700
chr1	161228150	161229000
chr1	161535720	161536980
chr1	162665950	162666650
chr1	164559800	164560350
chr1	16482300	16482850
chr1	16502300	16502600
chr1	165737800	165738550
chr1	167601001	167601975
chr1	167690626	167691675
chr1	16840276	16841250
chr1	168412951	168413550
chr1	16939550	16940600
chr1	17051176	17052150
chr1	17215580	17215600
chr1	174998700	174999350
chr1	175560300	175560600
chr1	17732500	17733150
chr1	179334600	179335450
chr1	179783600	179784450
chr1	181122076	181122600
chr1	181149001	181149600
chr1	181455001	181455300
chr1	182057101	182057475
chr1	182557850	182558700
chr1	182570400	182570950
chr1	182929530	182929550
chr1	183440200	183440650
chr1	183441900	183442250
chr1	183573226	183574125
chr1	183884950	183885500
chr1	184355800	184356450
chr1	185139376	185139975
chr1	197108427	197108447
chr1	1976200	1976700
chr1	197744350	197744950
chr1	198582076	198582450
chr1	19967050	19967650
chr1	200123101	200123850
chr1	200153250	200153800
chr1	200638750	200638900
chr1	200877450	200878100
chr1	200990101	200990550
chr1	201398984	201399004
chr1	202123800	202124350
chr1	202558150	202558850
chr1	202569600	202571010
chr1	203449550	203450300
chr1	203651701	203652300
chr1	204120750	204121150
chr1	204727600	204728250
chr1	204732750	204733450
chr1	205196700	205197400
chr1	205410001	205410600
chr1	205454400	205455050
chr1	205538003	205538023
chr1	205562626	205563150
chr1	205648750	205649550
chr1	20649526	20650050
chr1	206643250	206644100
chr1	206702238	206702258
chr1	206736151	206736900
chr1	206756950	206757400
chr1	206899550	206900050
chr1	207627900	207628350
chr1	208098400	208099000
chr1	208305200	208305500
chr1	210931950	210932450
chr1	2115818	2115838
chr1	212629050	212629650
chr1	2158900	2159600
chr1	21960400	21960900
chr1	220473700	220474200
chr1	22109250	22109950
chr1	22257550	22258050
chr1	222628100	222628400
chr1	223263250	223263850
chr1	223302550	223303150
chr1	223885850	223886400
chr1	224363398	224363418
chr1	224363448	224363468
chr1	224622151	224623125
chr1	224669200	224669800
chr1	225632401	225633375
chr1	226384600	226385150
chr1	227015600	227016250
chr1	227175250	227177560
chr1	22778500	22779150
chr1	228191800	228192400
chr1	228296720	228296840
chr1	228931300	228931750
chr1	22925326	22925625
chr1	229569835	229569855
chr1	230933500	230934050
chr1	231557300	231558650
chr1	234247100	234247700
chr1	234792700	234793350
chr1	235012126	235012425
chr1	235901295	235901315
chr1	236579401	236580075
chr1	23694450	23695250
chr1	23871150	23871650
chr1	2406450	2406900
chr1	240800342	240800362
chr1	242220377	242220397
chr1	2423176	2423550
chr1	244624250	244625200
chr1	247170800	247171750
chr1	247553300	247553900
chr1	249152100	249152600
chr1	25174351	25175325
chr1	25663946	25663966
chr1	25756450	25757050
chr1	26662700	26663550
chr1	26699701	26700150
chr1	26758200	26759100
chr1	27147226	27147600
chr1	27189151	27189450
chr1	2725651	2725950
chr1	27370950	27371500
chr1	27463351	27464175
chr1	27709500	27710100
chr1	27970300	27970800
chr1	28099250	28100050
chr1	28525876	28526550
chr1	28527142	28527162
chr1	28559250	28559800
chr1	28586450	28587000
chr1	28623200	28623750
chr1	28862851	28863150
chr1	28879126	28880250
chr1	31222351	31223175
chr1	31895400	31895950
chr1	32226226	32226900
chr1	32478900	32479700
chr1	32479950	32480250
chr1	32528050	32528450
chr1	33077550	33078250
chr1	33219100	33219800
chr1	35657251	35658000
chr1	3693100	3693450
chr1	37586300	37586800
chr1	37952800	37953400
chr1	38470800	38471450
chr1	38474920	38474940
chr1	38475076	38475375
chr1	38506200	38506600
chr1	39492150	39492700
chr1	39564150	39564700
chr1	40024369	40024389
chr1	40071800	40072250
chr1	40783478	40783498
chr1	41315600	41316050
chr1	41343250	41343800
chr1	41364100	41364750
chr1	41397750	41398150
chr1	44495450	44496000
chr1	45285151	45286200
chr1	45476551	45477375
chr1	45671900	45672550
chr1	46016101	46017225
chr1	46598400	46599250
chr1	47779500	47780350
chr1	51763450	51763800
chr1	52082401	52083300
chr1	53685650	53686600
chr1	53760151	53760600
chr1	53828900	53829350
chr1	55537100	55537550
chr1	565010	565030
chr1	569600	570250
chr1	57043800	57044400
chr1	5805800	5806350
chr1	6051516	6051536
chr1	61515400	61516100
chr1	62901376	62903550
chr1	6557350	6557700
chr1	6673100	6674050
chr1	68577450	68577950
chr1	76251500	76252200
chr1	78148850	78149550
chr1	85219150	85219600
chr1	860000	860450
chr1	860800	861300
chr1	8763100	8763750
chr1	877876	878175
chr1	8907900	8908450
chr1	90286150	90286800
chr1	90308401	90309750
chr1	935900	936450
chr1	9363100	9363550
chr1	94050400	94051150
chr1	94080751	94081050
chr1	94132250	94132600
chr1	94244950	94245900
chr1	95349400	95350150
chr1	95421300	95421800
chr1	958651	959100
chr1	9711826	9712950
chr1	98519550	98520100
chr1	9969826	9971475
chr10	102921350	102922000
chr10	103023297	103023317
chr10	103124300	103124900
chr10	103539450	103540100
chr10	104163740	104164330
chr10	104216044	104216064
chr10	104372551	104373075
chr10	105000950	105001650
chr10	106065250	106065800
chr10	112201426	112202025
chr10	112259176	112259700
chr10	114981400	114981800
chr10	115144750	115145350
chr10	1155950	1156500
chr10	115999000	115999600
chr10	116259226	116259750
chr10	116273026	116273400
chr10	118453750	118454100
chr10	118975951	118976625
chr10	120514250	120515100
chr10	120789751	120790350
chr10	121484950	121485900
chr10	123778550	123778850
chr10	126218550	126219200
chr10	126236251	126236625
chr10	126288301	126288600
chr10	126337276	126337725
chr10	126385051	126385650
chr10	126421276	126421575
chr10	126847200	126847500
chr10	126847801	126848100
chr10	129893626	129894150
chr10	130834801	130835325
chr10	133776050	133776450
chr10	133918126	133918425
chr10	134922450	134924830
chr10	135013201	135013725
chr10	14596150	14596550
chr10	14613850	14614600
chr10	14630026	14630550
chr10	14995550	14996550
chr10	16563301	16563600
chr10	16563676	16563975
chr10	2125730	2126280
chr10	21784426	21786000
chr10	22614400	22614850
chr10	28957500	28958100
chr10	30475550	30475950
chr10	3169150	3169450
chr10	32645926	32646375
chr10	33269250	33269900
chr10	35641501	35641950
chr10	35668276	35668575
chr10	35784450	35784850
chr10	3824500	3825050
chr10	38264851	38266200
chr10	38380969	38380989
chr10	3923850	3924250
chr10	3948650	3948950
chr10	43361750	43362050
chr10	43592776	43593075
chr10	43857400	43858400
chr10	44143800	44144700
chr10	44668200	44668500
chr10	44879700	44880000
chr10	45297400	45297700
chr10	45875626	45875925
chr10	46914078	46914098
chr10	48155650	48156050
chr10	49514101	49515600
chr10	50726050	50728200
chr10	5333476	5334825
chr10	5335501	5336550
chr10	5586500	5586800
chr10	60616100	60616800
chr10	61468600	61468900
chr10	6242776	6243225
chr10	6312151	6312750
chr10	6540601	6541125
chr10	70817326	70817850
chr10	71077750	71078250
chr10	71220376	71220750
chr10	71490950	71491400
chr10	71642101	71642400
chr10	71906100	71906950
chr10	73869376	73869750
chr10	74020400	74020900
chr10	75534289	75534309
chr10	7567300	7567600
chr10	76584601	76587300
chr10	7729100	7729650
chr10	79293350	79293900
chr10	79648900	79649650
chr10	80516500	80516950
chr10	80683800	80684150
chr10	80814000	80814400
chr10	8130376	8130975
chr10	82289101	82290450
chr10	86687250	86687800
chr10	87371626	87373200
chr10	87900901	87901200
chr10	88343850	88344150
chr10	88729228	88729248
chr10	89878800	89879300
chr10	93431900	93432250
chr10	93567243	93567263
chr10	93668800	93669150
chr10	93669230	93669250
chr10	95270427	95270447
chr10	95721287	95721307
chr10	98035800	98036200
chr10	98346450	98347200
chr10	98808001	98808375
chr10	99051800	99052800
chr10	99392776	99393675
chr10	99478250	99478950
chr10	99519050	99519650
chr11	10326376	10326900
chr11	10663201	10663500
chr11	10947100	10947400
chr11	111782400	111782800
chr11	112096750	112097800
chr11	114033300	114034000
chr11	11476300	11476850
chr11	117015150	117015550
chr11	117576800	117577100
chr11	117843300	117843700
chr11	117881626	117881925
chr11	11809351	11809650
chr11	118122600	118123350
chr11	118479826	118480425
chr11	118927930	118927950
chr11	119252000	119252850
chr11	119260450	119260950
chr11	119600500	119601050
chr11	120856550	120857150
chr11	122451150	122451700
chr11	122532200	122532700
chr11	123065300	123065900
chr11	12399200	12400000
chr11	124041450	124042250
chr11	124311044	124311064
chr11	124958750	124959150
chr11	125462463	125462483
chr11	125756800	125757250
chr11	125801354	125801374
chr11	1260000	1260550
chr11	126164139	126164159
chr11	126256350	126257150
chr11	128159776	128160900
chr11	129677930	129678700
chr11	129724100	129724850
chr11	129912300	129912600
chr11	129938900	129940100
chr11	131780500	131781050
chr11	131898500	131898950
chr11	13298101	13300500
chr11	133837201	133837650
chr11	133904600	133905150
chr11	133920250	133920850
chr11	134009810	134010550
chr11	134144129	134144149
chr11	134162900	134163400
chr11	134263300	134263900
chr11	134449150	134449800
chr11	134509500	134510350
chr11	14928676	14929725
chr11	1575300	1575900
chr11	17008650	17009200
chr11	17035980	17036000
chr11	1706849	1706869
chr11	17215026	17215046
chr11	17229750	17230050
chr11	17428801	17429100
chr11	1754650	1755050
chr11	1769400	1769750
chr11	18034250	18035050
chr11	1861051	1861500
chr11	1874926	1875600
chr11	18753526	18753975
chr11	19102050	19102500
chr11	1940782	1940802
chr11	19940650	19941250
chr11	2192176	2192475
chr11	2389351	2389725
chr11	2449501	2449875
chr11	31979600	31980150
chr11	34018400	34019000
chr11	34175026	34175325
chr11	34671826	34672650
chr11	40489980	40490390
chr11	44970950	44971250
chr11	449850	450550
chr11	45104900	45105450
chr11	45254950	45255450
chr11	45912650	45913150
chr11	46373300	46373600
chr11	46638400	46639050
chr11	47292376	47292675
chr11	47623880	47624300
chr11	48022950	48023450
chr11	51580300	51580600
chr11	537150	537800
chr11	567826	568125
chr11	568200	568900
chr11	56884000	56884450
chr11	57060350	57061100
chr11	59324600	59325350
chr11	61202900	61203450
chr11	61447450	61448500
chr11	61658926	61659825
chr11	62266850	62267450
chr11	62432000	62433100
chr11	62457361	62457381
chr11	62538500	62539450
chr11	62752200	62752500
chr11	63330845	63330865
chr11	63753450	63754150
chr11	64067900	64068950
chr11	6434776	6435600
chr11	64691300	64691950
chr11	65017750	65018200
chr11	65238700	65239350
chr11	65341400	65342200
chr11	65479250	65479600
chr11	65554483	65554503
chr11	65769540	65769560
chr11	65769637	65769657
chr11	66045601	66045900
chr11	66102076	66102375
chr11	66221695	66221715
chr11	6639751	6641100
chr11	66494550	66495650
chr11	66794900	66795800
chr11	67168750	67169800
chr11	67220190	67220210
chr11	67615950	67616450
chr11	67806100	67806750
chr11	67980000	67980600
chr11	68610526	68610825
chr11	69379050	69379500
chr11	69924300	69924800
chr11	70042150	70042600
chr11	70998150	70998700
chr11	71276599	71276619
chr11	71854900	71855450
chr11	72182200	72182750
chr11	72337051	72337350
chr11	73116332	73116352
chr11	73163055	73163075
chr11	73693600	73694850
chr11	74457149	74457169
chr11	74587321	74587341
chr11	74975323	74975343
chr11	75417150	75417800
chr11	76156500	76157250
chr11	76746500	76746850
chr11	76799550	76800200
chr11	77490800	77491440
chr11	77899350	77900150
chr11	78285400	78286250
chr11	792676	793200
chr11	8040301	8040825
chr11	82516386	82516406
chr11	859750	860100
chr11	8835100	8835650
chr11	93861750	93862950
chr11	93864600	93864950
chr11	96122700	96123650
chr11	97408800	97409100
chr11	9779401	9780300
chr12	100012220	100014280
chr12	10378647	10378667
chr12	104879251	104879925
chr12	105071250	105071950
chr12	105158476	105158850
chr12	10516358	10516378
chr12	106589450	106589750
chr12	109011750	109012350
chr12	109301500	109302000
chr12	110302600	110303150
chr12	110511301	110511675
chr12	110887550	110887900
chr12	111116850	111117400
chr12	111135900	111136600
chr12	111806251	111807300
chr12	112819400	112820600
chr12	113468600	113469050
chr12	113541451	113542275
chr12	113590690	113591010
chr12	113750200	113750800
chr12	113900050	113900650
chr12	114350450	114350900
chr12	115105750	115106400
chr12	116737250	116737850
chr12	117140950	117141500
chr12	117256900	117257700
chr12	117557400	117558000
chr12	118492876	118493325
chr12	118589950	118590350
chr12	119611050	119611350
chr12	120555296	120555316
chr12	120740109	120740129
chr12	120972500	120973000
chr12	121148700	121149050
chr12	121998500	121999050
chr12	122232251	122232271
chr12	122260726	122261175
chr12	122469450	122469950
chr12	122516750	122517100
chr12	123236800	123237850
chr12	123481876	123482175
chr12	123616351	123617025
chr12	123920851	123921750
chr12	12419551	12420450
chr12	124456126	124456650
chr12	124456801	124458150
chr12	124805350	124806000
chr12	124844000	124845200
chr12	124856401	124856700
chr12	124876276	124876650
chr12	125449651	125449950
chr12	126467450	126468500
chr12	127358860	127359000
chr12	127650200	127651200
chr12	127865450	127866000
chr12	129056626	129056925
chr12	129308200	129308900
chr12	12991951	12992325
chr12	131488201	131488575
chr12	132195550	132195900
chr12	132323926	132324225
chr12	132380400	132381500
chr12	132404626	132405075
chr12	132632926	132633225
chr12	132984376	132984900
chr12	133033736	133033756
chr12	133038818	133038838
chr12	133075876	133076325
chr12	133104601	133104975
chr12	133136900	133137450
chr12	133321732	133321752
chr12	14518150	14518750
chr12	15114652	15114672
chr12	1683376	1683825
chr12	1739400	1739900
chr12	1931251	1931625
chr12	2016850	2017400
chr12	20704100	20704750
chr12	208650	209100
chr12	21843451	21844350
chr12	22488350	22488950
chr12	27676600	27677600
chr12	2862288	2862308
chr12	31116301	31116600
chr12	31226800	31227400
chr12	3182450	3183000
chr12	31945165	31945185
chr12	32553000	32553300
chr12	34447126	34447425
chr12	34554376	34554675
chr12	3981976	3982950
chr12	40063126	40063875
chr12	4273801	4274475
chr12	42983400	42983800
chr12	4324426	4324950
chr12	45609400	45610200
chr12	46383301	46386075
chr12	47700601	47700900
chr12	48175500	48176250
chr12	48214300	48214850
chr12	48389700	48390330
chr12	48398259	48398279
chr12	49159967	49159987
chr12	49389000	49389700
chr12	49716451	49717575
chr12	49740001	49740300
chr12	49741340	49742550
chr12	50650117	50650137
chr12	51419650	51420650
chr12	51664192	51664212
chr12	52513100	52514300
chr12	52607100	52607750
chr12	53552750	53553550
chr12	53717776	53719125
chr12	54610650	54611200
chr12	54793000	54793550
chr12	56367687	56367707
chr12	56479400	56480310
chr12	57326500	57327100
chr12	57569890	57570820
chr12	57621300	57621950
chr12	57623600	57624100
chr12	57913032	57913052
chr12	58135550	58136250
chr12	58162759	58162779
chr12	58274800	58275350
chr12	58290601	58290900
chr12	58934200	58934750
chr12	59507450	59508050
chr12	6054200	6054650
chr12	62860200	62860900
chr12	6486886	6486906
chr12	65002550	65003150
chr12	65005651	65006175
chr12	66275650	66275950
chr12	6832801	6833850
chr12	69277950	69278500
chr12	6960300	6960750
chr12	7052131	7052151
chr12	76017400	76018050
chr12	79258150	79258700
chr12	80327626	80329875
chr12	8088376	8089425
chr12	8230876	8231400
chr12	8543026	8543550
chr12	861850	862500
chr12	89744551	89748525
chr12	9101326	9104025
chr12	9106126	9107250
chr12	9216850	9217150
chr12	93301801	93302400
chr12	93964550	93964900
chr12	93965534	93965554
chr12	94495950	94496500
chr12	95043226	95044575
chr12	95510900	95511400
chr12	96337000	96337500
chr12	96455550	96456050
chr12	96487500	96488450
chr12	96501976	96502575
chr12	96514426	96515025
chr12	96587926	96590175
chr12	98896950	98898050
chr12	99050326	99050625
chr13	100027201	100028100
chr13	100035601	100035900
chr13	102068550	102068900
chr13	103232776	103233300
chr13	103654600	103655050
chr13	107570000	107570400
chr13	110298226	110298525
chr13	110790001	110790300
chr13	110993176	110993625
chr13	111098850	111099150
chr13	112852126	112852425
chr13	113496901	113497200
chr13	113596876	113598075
chr13	114017600	114018300
chr13	114056701	114057225
chr13	114517300	114517800
chr13	114897850	114898350
chr13	114905551	114906825
chr13	20976376	20977050
chr13	21608000	21608450
chr13	21714001	21715425
chr13	24827626	24829200
chr13	30536026	30536325
chr13	31037830	31039930
chr13	31264351	31264800
chr13	32820500	32820950
chr13	33385426	33385875
chr13	33914776	33915225
chr13	41007676	41008275
chr13	41238700	41239150
chr13	41345299	41345319
chr13	44947791	44947811
chr13	50069500	50069950
chr13	50510150	50510900
chr13	52371751	52372275
chr13	53024450	53025150
chr13	53542050	53542650
chr13	58203526	58203825
chr13	67803451	67805550
chr13	79998151	79998600
chr13	88323100	88323950
chr14	100004550	100004900
chr14	100038000	100038300
chr14	100046350	100046700
chr14	100771576	100771875
chr14	100771951	100772325
chr14	100772450	100773250
chr14	100883600	100884200
chr14	102431350	102431950
chr14	102543796	102543816
chr14	102938950	102939700
chr14	102948000	102948550
chr14	103058400	103059250
chr14	103982700	103983250
chr14	103986826	103987200
chr14	104095250	104096000
chr14	104174776	104175075
chr14	104195520	104196120
chr14	104214826	104215200
chr14	104602276	104602800
chr14	104651176	104651700
chr14	105045376	105045675
chr14	105155300	105156200
chr14	105348550	105349200
chr14	105478450	105479000
chr14	105559576	105560475
chr14	105775500	105776150
chr14	105814651	105814950
chr14	105906901	105907350
chr14	105956800	105957850
chr14	106003850	106004650
chr14	106048951	106049325
chr14	106139641	106139661
chr14	106873501	106873875
chr14	20993571	20993591
chr14	21944900	21945600
chr14	23018926	23019525
chr14	23451457	23451477
chr14	23938300	23939150
chr14	24641052	24641072
chr14	24684526	24685650
chr14	24740935	24740955
chr14	31331250	31331750
chr14	32670100	32671150
chr14	34930850	34931950
chr14	35183450	35184250
chr14	35802151	35802750
chr14	37667108	37667128
chr14	38061150	38061700
chr14	38594476	38595150
chr14	39583100	39583950
chr14	45737700	45738200
chr14	50359880	50359970
chr14	54805450	54805800
chr14	56584201	56586450
chr14	57857600	57857950
chr14	58633000	58633550
chr14	59827950	59828600
chr14	59950350	59951500
chr14	59973810	59976100
chr14	60650776	60651375
chr14	61801651	61802175
chr14	61905676	61906275
chr14	61980700	61981050
chr14	64194747	64194767
chr14	64854350	64855200
chr14	65163076	65163525
chr14	65437726	65438250
chr14	65878276	65880000
chr14	67946550	67947350
chr14	68195900	68196200
chr14	69256426	69256725
chr14	69262300	69263200
chr14	69509450	69510050
chr14	70026250	70026550
chr14	70124500	70125200
chr14	70724200	70724700
chr14	72398550	72399450
chr14	74036350	74036900
chr14	74197700	74198250
chr14	74210026	74210775
chr14	74252026	74252325
chr14	75583293	75583313
chr14	75963601	75963900
chr14	76100040	76101250
chr14	76842150	76842900
chr14	77315200	77315700
chr14	77534400	77535050
chr14	77674900	77675450
chr14	77737645	77737665
chr14	77786500	77787050
chr14	78121150	78121800
chr14	79745250	79746050
chr14	82717750	82718250
chr14	84027826	84028125
chr14	89017931	89017951
chr14	89133750	89134300
chr14	89643700	89644250
chr14	89680400	89681050
chr14	90740400	90740700
chr14	90797800	90798750
chr14	90909750	90910250
chr14	91643626	91644075
chr14	91707976	91708500
chr14	91716076	91716975
chr14	91720876	91721400
chr14	91730600	91730900
chr14	91798350	91798900
chr14	91871476	91872300
chr14	93214600	93215350
chr14	93798650	93799250
chr14	94366051	94366500
chr14	94428901	94429875
chr14	94467950	94468600
chr14	95907250	95907600
chr14	96549850	96550500
chr14	96564900	96565500
chr14	99372650	99373450
chr14	99658300	99658800
chr14	99728401	99729750
chr14	99982276	99982575
chr15	100514251	100514550
chr15	101548400	101549100
chr15	101707900	101708300
chr15	102520876	102521325
chr15	22433401	22435650
chr15	22441576	22442100
chr15	22465651	22468050
chr15	22923400	22924000
chr15	22977050	22977700
chr15	25425976	25426275
chr15	30465151	30465750
chr15	32901750	32902270
chr15	40373800	40374350
chr15	40524273	40524293
chr15	40541600	40542200
chr15	40623839	40623859
chr15	40634700	40635500
chr15	41291462	41291482
chr15	41800000	41800550
chr15	42119850	42120800
chr15	42864115	42864135
chr15	43803650	43804150
chr15	44955200	44955700
chr15	45926626	45927975
chr15	49912750	49913550
chr15	53072776	53073150
chr15	55735545	55735565
chr15	55790300	55790900
chr15	57179000	57180000
chr15	58540276	58541025
chr15	59062900	59063800
chr15	63188700	63189100
chr15	63897976	63898500
chr15	63902200	63902750
chr15	64445251	64445550
chr15	64626700	64627200
chr15	64679550	64680300
chr15	64973500	64974050
chr15	65135176	65135625
chr15	66116350	66116900
chr15	66544600	66545100
chr15	68075476	68076150
chr15	69085600	69086150
chr15	69327450	69328050
chr15	69571004	69571024
chr15	69744526	69745875
chr15	70392950	70393350
chr15	71409250	71409750
chr15	72093450	72093800
chr15	72103201	72103575
chr15	72103651	72103950
chr15	74495100	74495700
chr15	74833050	74833700
chr15	75109250	75110200
chr15	75120460	75122470
chr15	75134750	75135950
chr15	75494750	75495150
chr15	75628150	75628700
chr15	75742500	75742950
chr15	75805371	75805391
chr15	75939750	75940400
chr15	75976000	75976550
chr15	76030301	76030321
chr15	77197250	77198050
chr15	77328601	77329050
chr15	78027226	78027600
chr15	78426100	78426650
chr15	78570550	78571000
chr15	79755200	79755900
chr15	81558100	81558600
chr15	81616250	81617050
chr15	82331570	82334020
chr15	82490200	82490750
chr15	82981800	82982250
chr15	83477950	83478800
chr15	83620800	83621750
chr15	85177095	85177115
chr15	85215050	85215550
chr15	85291856	85291876
chr15	85711700	85712400
chr15	86250151	86250825
chr15	86383600	86384250
chr15	86622650	86623050
chr15	89178301	89179800
chr15	89679716	89679736
chr15	89787170	89787190
chr15	89877500	89878700
chr15	89954600	89955150
chr15	90304250	90304850
chr15	90419762	90419782
chr15	90436800	90437700
chr15	90514600	90515200
chr15	90744301	90745125
chr15	93288950	93289600
chr15	93374750	93375500
chr15	97323151	97323450
chr15	98971300	98972150
chr15	99320000	99320400
chr16	10276601	10276621
chr16	10672200	10672850
chr16	11448376	11449125
chr16	11453050	11453800
chr16	1156100	1156750
chr16	11922450	11923000
chr16	11945000	11945950
chr16	12351850	12352350
chr16	1372836	1372856
chr16	1464060	1464610
chr16	1495334	1495354
chr16	1524700	1525450
chr16	15670450	15671200
chr16	1588801	1589250
chr16	1823146	1823166
chr16	18957550	18957950
chr16	18994850	18995750
chr16	19513001	19513021
chr16	19532850	19533750
chr16	19830940	19830960
chr16	2016814	2016834
chr16	2070550	2070850
chr16	20817601	20818125
chr16	21312160	21312180
chr16	2205689	2205709
chr16	22199750	22200300
chr16	2225550	2225850
chr16	22308720	22308740
chr16	22332500	22333050
chr16	24528200	24528700
chr16	2479385	2479405
chr16	2521490	2521510
chr16	25268626	25269825
chr16	2569900	2570650
chr16	27078650	27078950
chr16	27468300	27468900
chr16	28288950	28289800
chr16	28303150	28304100
chr16	284401	285375
chr16	28857350	28858200
chr16	29732800	29733300
chr16	29776750	29777150
chr16	29822300	29823100
chr16	30064050	30064800
chr16	3038952	3038972
chr16	30441100	30441900
chr16	30457492	30457512
chr16	30621050	30621500
chr16	30635323	30635343
chr16	3068436	3068456
chr16	30817100	30817400
chr16	30906271	30906291
chr16	30932851	30935025
chr16	31008250	31008900
chr16	31021939	31021959
chr16	31084350	31084900
chr16	31105726	31106550
chr16	31188601	31188975
chr16	3162200	3162850
chr16	31884850	31885350
chr16	330901	331200
chr16	33952900	33953450
chr16	3414550	3415450
chr16	34825200	34825750
chr16	3549976	3550425
chr16	3929776	3930300
chr16	4012726	4013175
chr16	4400600	4401250
chr16	4422076	4422600
chr16	451351	452250
chr16	48952750	48953200
chr16	50347576	50348025
chr16	50840050	50840800
chr16	54128350	54129000
chr16	54962776	54963525
chr16	54970750	54971100
chr16	57074926	57075825
chr16	57395150	57395700
chr16	57520351	57520650
chr16	58059300	58059950
chr16	58283476	58284300
chr16	58652569	58652589
chr16	58694950	58695550
chr16	59294701	59295000
chr16	603837	603857
chr16	628951	629325
chr16	6623600	6624100
chr16	66785250	66785550
chr16	66914050	66914950
chr16	66928950	66929600
chr16	67271576	67271596
chr16	67752800	67753650
chr16	67880625	67880645
chr16	68002200	68002900
chr16	68027000	68027650
chr16	686000	687200
chr16	68812500	68813250
chr16	69333575	69333595
chr16	69830020	69831790
chr16	70170450	70171050
chr16	71570479	71570499
chr16	72127250	72128050
chr16	72158650	72159200
chr16	74497876	74497896
chr16	74729600	74730250
chr16	75467600	75468250
chr16	77755951	77756850
chr16	81039826	81041625
chr16	81919550	81920050
chr16	83932100	83933000
chr16	83963300	83963800
chr16	84404300	84404800
chr16	84875200	84876050
chr16	85145800	85146300
chr16	85148400	85149050
chr16	85170900	85171500
chr16	85328550	85329100
chr16	85349850	85350500
chr16	85600450	85600800
chr16	85669250	85669850
chr16	86049900	86050400
chr16	86286200	86286500
chr16	863600	864050
chr16	86597400	86597900
chr16	8726401	8726925
chr16	87526351	87527100
chr16	88509250	88509900
chr16	88835850	88836850
chr16	89163301	89163975
chr16	89574050	89575300
chr16	89626650	89627550
chr16	89786798	89786818
chr16	89787384	89787404
chr16	89979816	89979836
chr16	90148200	90149150
chr16	9232850	9233300
chr17	1552400	1553100
chr17	1673100	1673400
chr17	16878150	16878650
chr17	17632900	17633400
chr17	17942200	17942900
chr17	1870550	1871050
chr17	19350350	19350900
chr17	19505562	19505582
chr17	19657000	19657600
chr17	19959590	19959610
chr17	21201451	21201750
chr17	21212251	21212625
chr17	2256901	2257425
chr17	2263726	2264100
chr17	26206900	26207500
chr17	26941464	26941484
chr17	2699176	2700075
chr17	27438750	27439300
chr17	27505000	27505550
chr17	27717001	27717900
chr17	27916791	27916811
chr17	28033276	28033800
chr17	28659076	28659675
chr17	29024750	29025250
chr17	29248600	29249250
chr17	29825400	29825800
chr17	30594700	30595050
chr17	30676800	30677450
chr17	33424666	33424686
chr17	34062420	34063740
chr17	35295660	35297580
chr17	35305801	35306550
chr17	36585300	36585650
chr17	36740500	36741300
chr17	36905300	36905800
chr17	37251001	37251300
chr17	37404600	37405050
chr17	37607000	37607900
chr17	37859400	37860100
chr17	38115050	38115700
chr17	38210651	38210671
chr17	38470650	38471300
chr17	38547580	38547600
chr17	38716250	38717000
chr17	39092700	39093400
chr17	39150375	39150395
chr17	39485450	39486050
chr17	40346326	40346775
chr17	40467451	40467825
chr17	40976101	40976700
chr17	41381550	41382500
chr17	41478600	41478950
chr17	41623550	41624150
chr17	41983800	41984200
chr17	4268850	4269150
chr17	42977125	42977145
chr17	43225350	43226200
chr17	43232900	43233350
chr17	43298926	43299375
chr17	43393750	43395100
chr17	43514850	43515550
chr17	43662300	43662850
chr17	45018050	45018600
chr17	45061150	45061550
chr17	45331050	45331600
chr17	45500882	45500902
chr17	45771800	45772500
chr17	46026450	46027050
chr17	46654050	46654500
chr17	47209850	47210600
chr17	47257650	47258150
chr17	47957700	47958350
chr17	48046200	48046750
chr17	48194450	48195050
chr17	48560070	48560700
chr17	48736100	48736400
chr17	48761950	48762600
chr17	48921400	48922150
chr17	49197526	49198725
chr17	55972700	55973100
chr17	56161750	56162050
chr17	56234251	56234625
chr17	56413100	56413550
chr17	58219350	58219900
chr17	59433800	59434550
chr17	59470850	59471350
chr17	60885450	60885950
chr17	61959500	61959950
chr17	62492851	62493750
chr17	62981851	62982450
chr17	63179850	63180250
chr17	64911100	64911750
chr17	65370600	65371200
chr17	65714200	65715790
chr17	66243500	66244550
chr17	66290250	66290750
chr17	70982150	70982750
chr17	71306950	71307250
chr17	7212150	7212450
chr17	72391000	72391950
chr17	72529100	72529600
chr17	72738226	72738750
chr17	72740700	72741650
chr17	72856956	72856976
chr17	72977900	72978850
chr17	72983800	72984550
chr17	73109950	73110650
chr17	73234700	73235200
chr17	73545800	73546400
chr17	73561000	73561650
chr17	73628850	73629500
chr17	73749751	73750275
chr17	73754700	73755200
chr17	73818200	73818650
chr17	73936800	73937600
chr17	74075900	74076250
chr17	74119750	74120250
chr17	74236400	74237300
chr17	74258700	74259000
chr17	74496950	74497900
chr17	74732400	74732700
chr17	7482912	7482932
chr17	75338401	75338850
chr17	75452251	75452700
chr17	75817100	75817650
chr17	76259200	76259600
chr17	76919550	76920200
chr17	76976051	76976071
chr17	77774550	77775050
chr17	77782300	77782950
chr17	78010425	78010445
chr17	7833111	7833131
chr17	79107098	79107118
chr17	79174250	79176030
chr17	79479600	79480250
chr17	79480300	79480700
chr17	7959700	7960200
chr17	80055850	80056500
chr17	80245800	80246400
chr17	80492150	80492600
chr17	80542060	80543770
chr17	80626550	80626850
chr17	8066026	8066475
chr17	80674950	80675250
chr17	8279550	8280400
chr17	8313500	8314050
chr17	884250	884550
chr17	9143251	9143700
chr17	9868900	9869200
chr18	105976	112800
chr18	11906310	11908200
chr18	12726850	12727250
chr18	12911251	12911550
chr18	13282351	13282800
chr18	13313326	13313850
chr18	13375201	13375725
chr18	13436626	13437075
chr18	14178700	14179150
chr18	19284200	19285150
chr18	20651101	20651850
chr18	22006951	22007250
chr18	2842951	2843400
chr18	29522176	29524050
chr18	29598300	29599100
chr18	30192600	30193000
chr18	32620900	32621850
chr18	32846851	32847900
chr18	34408051	34409775
chr18	43456310	43457780
chr18	46340251	46341150
chr18	46463800	46464250
chr18	47900926	47901750
chr18	55253550	55254250
chr18	56452450	56453150
chr18	56677050	56677500
chr18	56751376	56751825
chr18	568600	569150
chr18	57566750	57567600
chr18	59588851	59589225
chr18	67635076	67635825
chr18	74696551	74696850
chr18	77155651	77156775
chr18	77271676	77272050
chr18	77706950	77707450
chr18	78005250	78005800
chr18	9102350	9103050
chr19	10305050	10306000
chr19	10614044	10614064
chr19	10728300	10728850
chr19	11009600	11010500
chr19	11241450	11242000
chr19	11646650	11647250
chr19	12146200	12146900
chr19	12251800	12252300
chr19	12370931	12370951
chr19	1240100	1240600
chr19	12405300	12406100
chr19	1241401	1241925
chr19	12624658	12624678
chr19	12661876	12662775
chr19	12777250	12777850
chr19	13048750	13049650
chr19	13243351	13243650
chr19	13262300	13263000
chr19	13265000	13265450
chr19	13265851	13266300
chr19	13884900	13885500
chr19	13961100	13961500
chr19	1396456	1396476
chr19	13990750	13991450
chr19	1407000	1407750
chr19	14250650	14250950
chr19	14477300	14477900
chr19	15599200	15599650
chr19	15695450	15695900
chr19	17488138	17488158
chr19	18220600	18221000
chr19	18475650	18476100
chr19	18528200	18528600
chr19	1857200	1857750
chr19	1910250	1910600
chr19	19701950	19702400
chr19	2164138	2164158
chr19	23577900	23578650
chr19	23598650	23599100
chr19	2462750	2463250
chr19	2524800	2525450
chr19	2598900	2599750
chr19	29547050	29547450
chr19	29895750	29896450
chr19	30162050	30163000
chr19	30369800	30370400
chr19	3094398	3094418
chr19	33468400	33469490
chr19	33555814	33555834
chr19	34625000	34625750
chr19	34894950	34895500
chr19	34972300	34972650
chr19	34992300	34992850
chr19	3521308	3521328
chr19	35505226	35505900
chr19	35557700	35558050
chr19	35596863	35596883
chr19	35609150	35609600
chr19	3572765	3572785
chr19	35758900	35759200
chr19	36138750	36139450
chr19	36184600	36185150
chr19	36222150	36222800
chr19	36265950	36266950
chr19	36370500	36371100
chr19	36485700	36486550
chr19	36618601	36619275
chr19	36630250	36631200
chr19	37155690	37157590
chr19	37708550	37709450
chr19	37808300	37809100
chr19	37997000	37997550
chr19	38586200	38586750
chr19	38789400	38790100
chr19	38794500	38795100
chr19	38810050	38810800
chr19	3933091	3933111
chr19	39342226	39342900
chr19	39421100	39421850
chr19	39645650	39646100
chr19	39650850	39651600
chr19	40476550	40477350
chr19	40791292	40791312
chr19	40909750	40910050
chr19	40939150	40939600
chr19	42303350	42303650
chr19	4247077	4247097
chr19	42602950	42603350
chr19	42721600	42722300
chr19	42787400	42788550
chr19	42800050	42800600
chr19	42927526	42928425
chr19	45408800	45409100
chr19	45520150	45520650
chr19	45594550	45595250
chr19	45634150	45634750
chr19	45681250	45682350
chr19	45988950	45989250
chr19	46714300	46715150
chr19	47281876	47282175
chr19	47291841	47291861
chr19	4732550	4733100
chr19	47412600	47413050
chr19	474973	474993
chr19	48902900	48903300
chr19	49140100	49140450
chr19	49355580	49356930
chr19	49560850	49561350
chr19	49632400	49633050
chr19	49654800	49655550
chr19	4968376	4969425
chr19	4991450	4992350
chr19	50706400	50707150
chr19	50835450	50836050
chr19	52097400	52098100
chr19	52430678	52430698
chr19	52511200	52511800
chr19	52901250	52901600
chr19	53606350	53607150
chr19	53898550	53898850
chr19	54769850	54770400
chr19	54960055	54960075
chr19	54960213	54960233
chr19	54960490	54962470
chr19	55538800	55539200
chr19	5563850	5564350
chr19	5576939	5576959
chr19	55791741	55791761
chr19	55964300	55964700
chr19	56135476	56136225
chr19	56632450	56633250
chr19	56645950	56646300
chr19	56651800	56652750
chr19	57049450	57050600
chr19	57831450	57832150
chr19	57862276	57862800
chr19	57988600	57989300
chr19	58330726	58331400
chr19	58665600	58666900
chr19	59010450	59011150
chr19	5977650	5978000
chr19	6092200	6092900
chr19	6273650	6274400
chr19	6459771	6459791
chr19	6772351	6773025
chr19	6828910	6829790
chr19	7294001	7294021
chr19	7294100	7294750
chr19	8477750	8478400
chr19	859740	860610
chr19	9247000	9247600
chr2	100721100	100721600
chr2	101923126	101923950
chr2	102239476	102240075
chr2	102439651	102440175
chr2	105489600	105490300
chr2	105854350	105854800
chr2	106026250	106026550
chr2	106406476	106407150
chr2	106754326	106755000
chr2	106809451	106811475
chr2	107177100	107177750
chr2	10987693	10987713
chr2	110273800	110274350
chr2	110472850	110473350
chr2	112382401	112383000
chr2	11263100	11263500
chr2	11272650	11273450
chr2	113342230	113343550
chr2	113742601	113743200
chr2	114008776	114009300
chr2	11510700	11511000
chr2	11694200	11694650
chr2	11761550	11762050
chr2	118813651	118814100
chr2	118926901	118927350
chr2	11962850	11963400
chr2	120435451	120437250
chr2	120934276	120935400
chr2	121103709	121103729
chr2	127729426	127730025
chr2	127842076	127842825
chr2	12856600	12856900
chr2	129360901	129361275
chr2	129829288	129829308
chr2	131149050	131149650
chr2	134885101	134885550
chr2	136814551	136815075
chr2	149310076	149311650
chr2	149684101	149685075
chr2	152683876	152685675
chr2	153707328	153707348
chr2	157198750	157199450
chr2	157256700	157257700
chr2	158682350	158682850
chr2	159312950	159313650
chr2	160142350	160142900
chr2	166990900	166991300
chr2	169746650	169747300
chr2	172949350	172950400
chr2	174129301	174129900
chr2	174146754	174146774
chr2	175449850	175450300
chr2	1773400	1773950
chr2	178973071	178973091
chr2	179292950	179293550
chr2	182547830	182547850
chr2	182756380	182756400
chr2	183943200	183943900
chr2	19005600	19006100
chr2	191278200	191278600
chr2	191746300	191746600
chr2	198174001	198176175
chr2	201606100	201606950
chr2	201728700	201729200
chr2	20249851	20250825
chr2	204570901	204571650
chr2	204732076	204732825
chr2	204974300	204974850
chr2	20709650	20710250
chr2	216226490	216226690
chr2	217252876	217253700
chr2	217531250	217531700
chr2	218252450	218253300
chr2	219151051	219152325
chr2	219536500	219537100
chr2	219646550	219647100
chr2	220094429	220094449
chr2	220094469	220094489
chr2	220406300	220407000
chr2	220496551	220496850
chr2	223555250	223555700
chr2	225907651	225907950
chr2	227514751	227515350
chr2	232328700	232329900
chr2	232530950	232531600
chr2	232674546	232674566
chr2	233986600	233986950
chr2	235914151	235914450
chr2	236688000	236688550
chr2	238200000	238200450
chr2	238498950	238500450
chr2	238512076	238512825
chr2	240189700	240190200
chr2	240649426	240649950
chr2	241028400	241029000
chr2	241230800	241231250
chr2	241331626	241332000
chr2	241564351	241565025
chr2	241724776	241725525
chr2	242042176	242042700
chr2	242088550	242089250
chr2	242211100	242211650
chr2	242489000	242489550
chr2	242640600	242641200
chr2	24705601	24705975
chr2	25457251	25457550
chr2	26173750	26174350
chr2	26995300	26995650
chr2	27341750	27342050
chr2	27414300	27414800
chr2	27434450	27435550
chr2	27485700	27486050
chr2	27545600	27546300
chr2	27712250	27713100
chr2	28581901	28582875
chr2	28629526	28630200
chr2	30294950	30295500
chr2	36595150	36595550
chr2	37375663	37375683
chr2	38763000	38763650
chr2	39174700	39175200
chr2	39351200	39351950
chr2	43011600	43012100
chr2	43367101	43367475
chr2	44222850	44223350
chr2	44394800	44396150
chr2	45486100	45486650
chr2	46704526	46704975
chr2	46768850	46769300
chr2	46925750	46926500
chr2	48540301	48543450
chr2	54683000	54683400
chr2	56418700	56419200
chr2	60781201	60781725
chr2	61034176	61034775
chr2	61046326	61047225
chr2	61921500	61922150
chr2	62241200	62241750
chr2	64427101	64427775
chr2	65140300	65140850
chr2	65291776	65292825
chr2	65543050	65543900
chr2	65662750	65663350
chr2	67624051	67625550
chr2	68479500	68480250
chr2	68672600	68673050
chr2	70056200	70057100
chr2	70205551	70206150
chr2	70359526	70360275
chr2	70844600	70845100
chr2	71204400	71204750
chr2	71221651	71223000
chr2	72155476	72155850
chr2	73120700	73121050
chr2	73199176	73199625
chr2	74347100	74347950
chr2	74436570	74437060
chr2	74787420	74789340
chr2	75381050	75381650
chr2	85121851	85122300
chr2	85185100	85185750
chr2	85595880	85596860
chr2	85640650	85641000
chr2	85663351	85663875
chr2	85829250	85830200
chr2	85906150	85906800
chr2	85934401	85935000
chr2	8628151	8628750
chr2	86307000	86307450
chr2	86789800	86790850
chr2	8679900	8680600
chr2	87720200	87720550
chr2	8818650	8819350
chr2	88971150	88971650
chr2	89065126	89065650
chr2	90478726	90479250
chr2	95539900	95540200
chr2	96675950	96676500
chr2	96782550	96783150
chr2	96971000	96971650
chr2	97405550	97406200
chr2	99071026	99071475
chr2	99347050	99347600
chr20	10654598	10654618
chr20	17514000	17514500
chr20	19783100	19783750
chr20	1986450	1986900
chr20	20180500	20180850
chr20	2083200	2083750
chr20	2083800	2084200
chr20	21105750	21106350
chr20	21216100	21216700
chr20	2153100	2153550
chr20	23498696	23498716
chr20	23648950	23649500
chr20	24007726	24008475
chr20	24997800	24998400
chr20	25275670	25276230
chr20	25388000	25388750
chr20	2633350	2633750
chr20	2679750	2680050
chr20	30619368	30619388
chr20	3096150	3096550
chr20	31172800	31173200
chr20	31683650	31684250
chr20	31775187	31775207
chr20	31797500	31797950
chr20	31938659	31938679
chr20	32254300	32255050
chr20	32580650	32582000
chr20	33103150	33103600
chr20	33292320	33293160
chr20	33296750	33298150
chr20	33413442	33413462
chr20	33999601	34000125
chr20	34129400	34130350
chr20	34156450	34157050
chr20	34207000	34207900
chr20	36321950	36322700
chr20	36621200	36621650
chr20	3750300	3750950
chr20	388132	388152
chr20	42892840	42893080
chr20	43349100	43349750
chr20	43723980	43726300
chr20	43729743	43729763
chr20	44399800	44400350
chr20	44446300	44446850
chr20	44538710	44539500
chr20	44555950	44556250
chr20	44563257	44563277
chr20	44642350	44643250
chr20	45035550	45035850
chr20	45932950	45933500
chr20	46044151	46044525
chr20	46067500	46068100
chr20	46107744	46107764
chr20	46135000	46135600
chr20	46393050	46393550
chr20	48150700	48151200
chr20	48782300	48783100
chr20	48895400	48895950
chr20	49099951	49100475
chr20	49325550	49326000
chr20	49346100	49346550
chr20	49593600	49593900
chr20	50130826	50131200
chr20	50700150	50700600
chr20	52565626	52566375
chr20	52686800	52687650
chr20	55203350	55203850
chr20	55258450	55259000
chr20	55276560	55276580
chr20	55827500	55828000
chr20	55841200	55841750
chr20	55880650	55880950
chr20	56014250	56014950
chr20	56039850	56040450
chr20	56073750	56074300
chr20	56269900	56270550
chr20	58070900	58071450
chr20	58630726	58631175
chr20	60995900	60996250
chr20	61200100	61200750
chr20	61531450	61532550
chr20	61798651	61799100
chr20	61944976	61945275
chr20	61990876	61991250
chr20	61991330	61991350
chr20	62009743	62009763
chr20	62129250	62129850
chr20	62266501	62267700
chr20	62372326	62372625
chr20	62382151	62382825
chr20	62439419	62439439
chr20	62611426	62612925
chr20	62701050	62701500
chr20	656434	656454
chr20	708950	709450
chr21	16437900	16438350
chr21	18826550	18827350
chr21	29765450	29766100
chr21	30374776	30375525
chr21	30670900	30671500
chr21	31802562	31802582
chr21	34287001	34287375
chr21	34587751	34588650
chr21	35013601	35015175
chr21	35266950	35267500
chr21	35574200	35574700
chr21	37536600	37537050
chr21	38382000	38382700
chr21	38639176	38640675
chr21	38954800	38955350
chr21	41176100	41178250
chr21	42539500	42539800
chr21	43124250	43124850
chr21	43203450	43204000
chr21	43430486	43430506
chr21	43431076	43431450
chr21	45485176	45485775
chr21	45758050	45758500
chr21	47542051	47542425
chr21	47604550	47605300
chr21	9881650	9882350
chr22	18071948	18071968
chr22	18083950	18085230
chr22	18255950	18256400
chr22	18267800	18268450
chr22	18602500	18602900
chr22	18717751	18718425
chr22	18876601	18877125
chr22	18894400	18894850
chr22	19022067	19022087
chr22	19131976	19132650
chr22	19161900	19162550
chr22	19515058	19515078
chr22	19935100	19935650
chr22	19979150	19979550
chr22	20053590	20053610
chr22	20921100	20922800
chr22	23585251	23585775
chr22	23657650	23658150
chr22	23875600	23876000
chr22	24366740	24366760
chr22	25365800	25366350
chr22	25453150	25453650
chr22	25595807	25595827
chr22	25608699	25608719
chr22	26824600	26825350
chr22	30162600	30163600
chr22	30191550	30192050
chr22	30234001	30234750
chr22	30661651	30662475
chr22	30666826	30667125
chr22	30817750	30817770
chr22	30932260	30932760
chr22	31218900	31219400
chr22	31476976	31477500
chr22	31685690	31686950
chr22	31857640	31857660
chr22	36855300	36855800
chr22	37318330	37319280
chr22	37594501	37594875
chr22	37853300	37853850
chr22	37959200	37959550
chr22	38201000	38201600
chr22	38618650	38619300
chr22	39114300	39114900
chr22	39752350	39752950
chr22	40146122	40146142
chr22	40797601	40798050
chr22	41593050	41594050
chr22	42062500	42063150
chr22	42322000	42322450
chr22	42666350	42666900
chr22	44207900	44208500
chr22	45500950	45501500
chr22	46315250	46315850
chr22	46663250	46664150
chr22	50465850	50466650
chr22	50946125	50946145
chr3	100383976	100384575
chr3	101231350	101232150
chr3	10127400	10127490
chr3	101318478	101318498
chr3	101394850	101395650
chr3	101405250	101405950
chr3	105587550	105588600
chr3	10566500	10567050
chr3	108208426	108209025
chr3	110788726	110789325
chr3	111697400	111698400
chr3	111732350	111732650
chr3	111830551	111831075
chr3	11287750	11288200
chr3	11313650	11314400
chr3	113464900	113465450
chr3	113950351	113951025
chr3	114865900	114867100
chr3	11623550	11624100
chr3	11706700	11707300
chr3	11811750	11812950
chr3	118752900	118754100
chr3	119013200	119013800
chr3	119278250	119278850
chr3	119813200	119814300
chr3	120137650	120138250
chr3	122134650	122135550
chr3	123371100	123371700
chr3	124487550	124488100
chr3	124729400	124731460
chr3	124930750	124931050
chr3	12525450	12526450
chr3	126378750	126379250
chr3	126422600	126423350
chr3	127253476	127253775
chr3	127402500	127402850
chr3	127416300	127416750
chr3	12750300	12750700
chr3	12761300	12761950
chr3	128013826	128014575
chr3	128207476	128208525
chr3	128336350	128336900
chr3	128952376	128952975
chr3	129033500	129034100
chr3	129661000	129661550
chr3	13008650	13009050
chr3	13025550	13026200
chr3	13036150	13036950
chr3	133103150	133103750
chr3	134230245	134230265
chr3	13517200	13518100
chr3	13622050	13622600
chr3	136581450	136581850
chr3	137906099	137906119
chr3	138045970	138048140
chr3	138835950	138836500
chr3	141514726	141516975
chr3	14167000	14167400
chr3	141943600	141944750
chr3	14290250	14291000
chr3	14361000	14361600
chr3	143691250	143691800
chr3	14378400	14378900
chr3	14411000	14411600
chr3	14692750	14693500
chr3	149095555	149095575
chr3	149095642	149095662
chr3	150128400	150129000
chr3	150887776	150888150
chr3	15149550	15150000
chr3	15247200	15248250
chr3	155445420	155446220
chr3	156806251	156807900
chr3	160938700	160939700
chr3	16360726	16361250
chr3	169482200	169483250
chr3	170339000	170339450
chr3	170369000	170369500
chr3	171546826	171547125
chr3	173115350	173116050
chr3	174095024	174095044
chr3	177076051	177079125
chr3	179280151	179281800
chr3	182511000	182511600
chr3	182800080	182800480
chr3	183012850	183013600
chr3	183273001	183274050
chr3	183526719	183526739
chr3	183873166	183873186
chr3	183945100	183945600
chr3	184037000	184037650
chr3	184097851	184097871
chr3	18467000	18467800
chr3	185216100	185217200
chr3	185293050	185293700
chr3	185303500	185304500
chr3	185973700	185974200
chr3	186362710	186364030
chr3	186490350	186491250
chr3	186501600	186502300
chr3	186818850	186819300
chr3	193136140	193137490
chr3	193973026	193973850
chr3	193973900	193974500
chr3	194106750	194107200
chr3	194116876	194119125
chr3	194489525	194489545
chr3	194489550	194490550
chr3	194500400	194501050
chr3	194588150	194588550
chr3	194821600	194821900
chr3	195163400	195164350
chr3	195283100	195283600
chr3	195415508	195415528
chr3	195474500	195475250
chr3	195635701	195637200
chr3	196014818	196014838
chr3	196331401	196331925
chr3	196366300	196366850
chr3	197079750	197080350
chr3	197235000	197235300
chr3	197475976	197477850
chr3	24536050	24536850
chr3	27472550	27473150
chr3	27722551	27723375
chr3	31573350	31574650
chr3	32377126	32377650
chr3	32448400	32448850
chr3	33318650	33319350
chr3	34238250	34238850
chr3	37823200	37823650
chr3	37896750	37897350
chr3	37962400	37962950
chr3	38093240	38093260
chr3	38691100	38691400
chr3	39093100	39093800
chr3	39424650	39425400
chr3	40494200	40495150
chr3	42387226	42387750
chr3	42695166	42695186
chr3	42727001	42727021
chr3	43221451	43222050
chr3	43256000	43256600
chr3	4344700	4345600
chr3	43897100	43897650
chr3	44689850	44690550
chr3	45106276	45106800
chr3	45251850	45252450
chr3	45803326	45803625
chr3	45957151	45957900
chr3	46277626	46278300
chr3	47462520	47463930
chr3	48469726	48470100
chr3	48601276	48601875
chr3	4863050	4863600
chr3	49066500	49067250
chr3	49170100	49170220
chr3	49377151	49378575
chr3	49726922	49726942
chr3	49726950	49727300
chr3	49966700	49967650
chr3	50126026	50127075
chr3	50158800	50159450
chr3	50231851	50232525
chr3	50433900	50434350
chr3	50579800	50580300
chr3	50642350	50643650
chr3	52029120	52029870
chr3	5228800	5229650
chr3	52311676	52313325
chr3	52505300	52505950
chr3	53192900	53193250
chr3	53271830	53274260
chr3	53528350	53528650
chr3	53564418	53564438
chr3	53604650	53605250
chr3	54467750	54468300
chr3	59843326	59843925
chr3	64241500	64241900
chr3	67022176	67023150
chr3	67998301	67999275
chr3	71630701	71631000
chr3	71631076	71631600
chr3	75484100	75484950
chr3	82558201	82558500
chr3	82756100	82756600
chr3	8809300	8809900
chr3	89156401	89157300
chr3	93560150	93560850
chr3	93781400	93782400
chr3	9884900	9886050
chr3	9921928	9921948
chr4	1008901	1009800
[truncated: 805 more rows]
